# Supplementary material for: High-throughput sequencing of methylated cytosine enriched by modification-dependent restriction endonuclease MspJI
Source: PubMed Central journal article supplement (PMC3718668; doi:10.1186/1471-2156-14-56), 2013-06-18

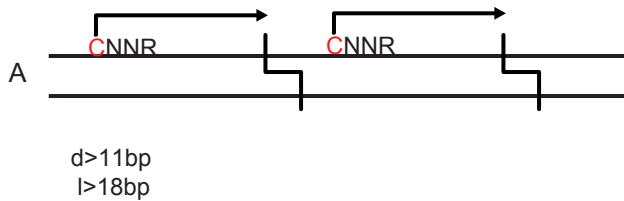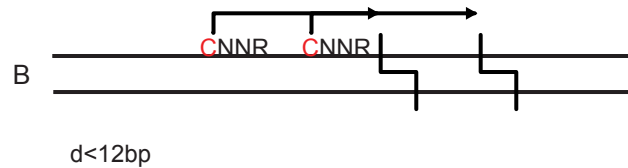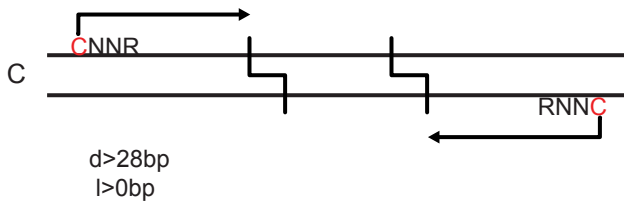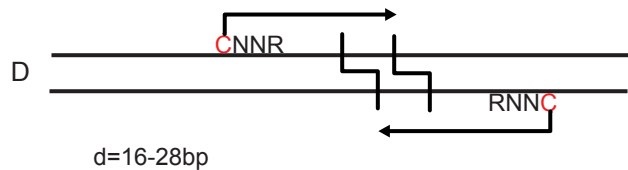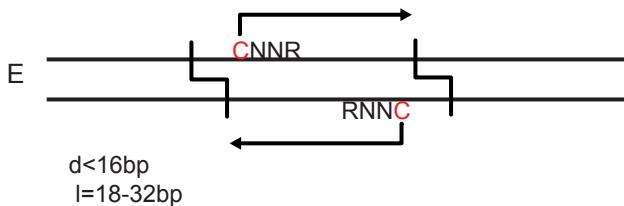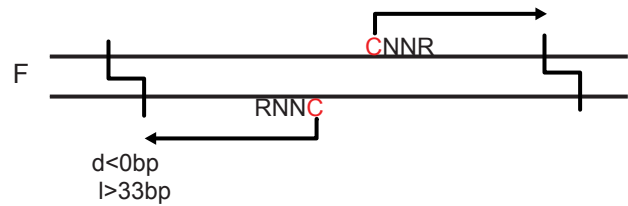

Supplement: 1471-2156-14-56-S1.pdf [file 1471-2156-14-56-S1.pdf]
