# Supplementary material for: High-throughput sequencing of methylated cytosine enriched by modification-dependent restriction endonuclease MspJI
Source: PubMed Central journal article supplement (PMC3718668; doi:10.1186/1471-2156-14-56), 2013-06-18
Supplement: 1471-2156-14-56-S2.pdf [file 1471-2156-14-56-S2.pdf]

| fragments length | total fragments | mapped fragments | mapping rate | uniquely mapped fragments | unique mapping rate |
|------------------|-----------------|------------------|--------------|---------------------------|---------------------|
| 28bp             | 119,667,533     | 119,478,663      | 99.8422%     | 108,818,562               | 90.9341%            |
| 29bp             | 119,667,554     | 119,478,998      | 99.8424%     | 107,972,698               | 90.2272%            |
| 30bp             | 119,667,547     | 119,478,887      | 99.8423%     | 108,272,453               | 90.4777%            |
| 31bp             | 119,667,540     | 119,478,773      | 99.8423%     | 108,552,848               | 90.7120%            |
| 32bp             | 119,667,533     | 119,478,663      | 99.8422%     | 108,818,562               | 90.9341%            |
| 33bp             | 119,667,526     | 119,478,543      | 99.8421%     | 109,071,669               | 91.1456%            |
| 34bp             | 119,667,519     | 119,478,433      | 99.8420%     | 109,310,307               | 91.3450%            |
| 35bp             | 119,667,512     | 119,478,320      | 99.8419%     | 109,537,830               | 91.5351%            |
