# Supplementary material for: High-throughput sequencing of methylated cytosine enriched by modification-dependent restriction endonuclease MspJI
Source: PubMed Central journal article supplement (PMC3718668; doi:10.1186/1471-2156-14-56), 2013-06-18
Supplement: 1471-2156-14-56-S3.pdf [file 1471-2156-14-56-S3.pdf]

Table A

| Clean Reads                     |                                 |                |
|---------------------------------|---------------------------------|----------------|
| 32107319(100%)                  |                                 |                |
| Mapped reads                    |                                 | Unmapped reads |
| 26215180(81.65%)                |                                 |                |
| Uniquely mapped reads           | Multiply mapped reads           | 5892139        |
| 6002218(18.69%)                 | 20212899                        |                |
| Uniquely mapped reads in repeat | Multiply mapped reads in repeat |                |
| 1955328                         | 13629943                        |                |

Table B

| Clean Reads                     |                                 |                |
|---------------------------------|---------------------------------|----------------|
| 27914133(100%)                  |                                 |                |
| Mapped reads                    |                                 | Unmapped reads |
| 19730492(70.68%)                |                                 |                |
| Uniquely mapped reads           | Multiply mapped reads           | 8183641        |
| 2607915(9.34%)                  | 17122577                        |                |
| Uniquely mapped reads in repeat | Multiply mapped reads in repeat |                |
| 1930035                         | 10655456                        |                |
