# Supplementary material for: High-throughput sequencing of methylated cytosine enriched by modification-dependent restriction endonuclease MspJI
Source: PubMed Central journal article supplement (PMC3718668; doi:10.1186/1471-2156-14-56), 2013-06-18
Supplement: 1471-2156-14-56-S4.pdf [file 1471-2156-14-56-S4.pdf]

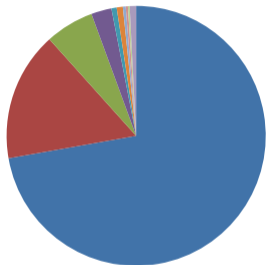

A

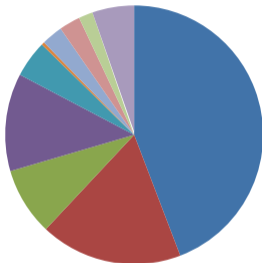

B

- Satellite/centr
- rRNA
- Satellite
- LTR/Gypsy
- DNA/MuDR
- LTR
- RC/Helitron
- LTR/Copia
- DNA/En-Spm
- other
